1 **Probing the biophysical constraints of SARS-CoV-2 spike N-terminal**  
2 **domain using deep mutational scanning**

3  
4 Wenhao O. Ouyang<sup>1,\*</sup>, Timothy J.C. Tan<sup>2,\*</sup>, Ruipeng Lei<sup>1</sup>, Ge Song<sup>3,4,5</sup>, Collin Kieffer<sup>6</sup>, Raiees  
5 Andrabi<sup>3,4,5</sup>, Kenneth A. Matreyek<sup>7</sup>, Nicholas C. Wu<sup>1,2,8,9,§</sup>

6  
7 <sup>1</sup> Department of Biochemistry, University of Illinois at Urbana-Champaign, Urbana, IL 61801,  
8 USA

9 <sup>2</sup> Center for Biophysics and Quantitative Biology, University of Illinois at Urbana-Champaign,  
10 Urbana, IL 61801, USA

11 <sup>3</sup> Department of Immunology and Microbiology, The Scripps Research Institute, La Jolla, CA  
12 92037, USA

13 <sup>4</sup> IAVI Neutralizing Antibody Center, The Scripps Research Institute, La Jolla, CA 92037, USA

14 <sup>5</sup> Consortium for HIV/AIDS Vaccine Development (CHAVD), The Scripps Research Institute, La  
15 Jolla, CA 92037, USA

16 <sup>6</sup> Department of Microbiology, University of Illinois at Urbana-Champaign, Urbana, IL 61801,  
17 USA

18 <sup>7</sup> Department of Pathology, Case Western Reserve University School of Medicine, Cleveland,  
19 OH 44106, USA

20 <sup>8</sup> Carl R. Woese Institute for Genomic Biology, University of Illinois at Urbana-Champaign,  
21 Urbana, IL 61801, USA

22 <sup>9</sup> Carle Illinois College of Medicine, University of Illinois at Urbana-Champaign, Urbana, IL  
23 61801, USA

24 \* These authors contributed equally to this work

25 § Correspondence: [nicwu@illinois.edu](mailto:nicwu@illinois.edu) (N.C.W.)

26 **ABSTRACT**

27 Increasing the expression level of the SARS-CoV-2 spike (S) protein has been critical for COVID-  
28 19 vaccine development. While previous efforts largely focused on engineering the receptor-  
29 binding domain (RBD) and the S2 subunit, the N-terminal domain (NTD) has been long  
30 overlooked due to the limited understanding of its biophysical constraints. In this study, the effects  
31 of thousands of NTD single mutations on S protein expression were quantified by deep mutational  
32 scanning. Our results revealed that in terms of S protein expression, the mutational tolerability of  
33 NTD residues was inversely correlated with their proximity to the RBD and S2. We also identified  
34 NTD mutations at the interdomain interface that increased S protein expression without altering  
35 its antigenicity. Overall, this study not only advances the understanding of the biophysical  
36 constraints of the NTD, but also provides invaluable insights into S-based immunogen design.

## 37 INTRODUCTION

38 The emergence of severe acute respiratory syndrome coronavirus-2 (SARS-CoV-2) has led to  
39 the coronavirus disease 2019 (COVID-19) pandemic<sup>1,2</sup>. As the major antigen of SARS-CoV-2,  
40 spike (S) glycoprotein plays a critical role in facilitating virus entry<sup>3,4</sup>. Therefore, antibodies to  
41 SARS-CoV-2 S are often neutralizing<sup>5,6</sup>. SARS-CoV-2 S protein consists of an N-terminal S1  
42 subunit, which is responsible for engaging the host receptor angiotensin-converting enzyme 2  
43 (ACE2) via the receptor-binding domain (RBD), as well as a C-terminal S2 subunit, which  
44 mediates virus-host membrane fusion<sup>4,7,8</sup>. The S1 subunit also contains an N-terminal domain  
45 (NTD) in addition to the RBD<sup>4,7</sup>. While the RBD is generally considered to be immunodominant,  
46 the NTD is also a target of neutralizing antibodies<sup>9-11</sup>. Structural studies revealed the presence of  
47 an antigenic supersite on the NTD that is frequently mutated in SARS-CoV-2 variants of concern  
48 (VOCs)<sup>12-17</sup>. In fact, amino acid mutations and indels rapidly accumulate within the NTD during  
49 the evolution of SARS-CoV-2 in human, at least partly due to the immune selection pressure<sup>18</sup>.  
50 On the other hand, antibodies to NTD epitopes that are conserved across VOCs have also been  
51 identified<sup>16,19</sup>. Despite the importance of NTD in immune response against SARS-CoV-2, the  
52 biophysical constraints of NTD remain largely elusive.

53

54 COVID-19 vaccines, including both recombinant protein-based and mRNA-based, are proven to  
55 be highly protective against SARS-CoV-2 infection<sup>20-23</sup>. There is an inverse relationship between  
56 the production yield and cost of recombinant protein-based COVID-19 vaccines, such as that from  
57 Novavax, which showed promising results in phase 3 clinical trials<sup>22</sup>, as well as others that are in  
58 earlier phases of clinical trials<sup>24</sup>. High protein expression level is also believed to be critical for the  
59 effectiveness of mRNA vaccines<sup>25</sup>. As a result, identifying mutations that increase S protein  
60 expression are crucial for optimizing COVID-19 vaccines. While most studies focused on mutating  
61 the S2 subunit as well as the RBD to increase S protein expression<sup>7,26-29</sup>, little effort has been  
62 spent on NTD due to the lack of understanding of its biophysical properties.

63

64 Phenotypes of numerous mutations can be measured in a massively parallel manner using deep  
65 mutational scanning, which combines saturation mutagenesis and next-generation sequencing<sup>30</sup>.

66 Previous studies have applied deep mutational scanning to evaluate the effects of RBD mutations  
67 on protein expression, ACE2-binding affinity, and antibody escape<sup>31–36</sup>. Although deep mutational  
68 scanning of the RBD provided important insights into immunogen design and SARS-CoV-2  
69 evolution<sup>29,31,32,35,36</sup>, similar studies on other regions of the S protein have not yet been carried out.

70

71 Here, we used deep mutational scanning to quantify the effects of thousands of NTD single  
72 mutations on S protein expression. One notable observation was that NTD residues, unlike RBD  
73 residues, showed a weak correlation between mutational tolerability and relative solvent  
74 accessibility (RSA). Instead, the mutational tolerability of NTD residues strongly correlated with  
75 their distance to RBD and S2. Residues S50 and G232 were two exceptions, in which they were  
76 proximal to S2 and RBD, respectively, and yet had a high mutational tolerability. Subsequently,  
77 we functionally characterized two mutations that increased S protein expression, namely S50Q  
78 and G232E. These results have important implications towards understanding NTD evolution and  
79 S-based immunogen design.

80

## 81 **RESULTS**

### 82 **Most NTD mutations have minimal impact on S protein expression**

83 To study how SARS-CoV-2 S protein expression is influenced by NTD mutations, we created a  
84 mutant library that contained all possible single amino acid mutations across residues 14-301 of  
85 the S protein. Each of these 288 residues was mutated with the choice of all 19 other amino acids  
86 and the stop codon, leading to a mutant library with 5,760 single amino acid mutations. The mutant  
87 library was expressed using the HEK293T landing pad cell system, such that each transfected  
88 cell stably expressed only one mutant<sup>37,38</sup>. Fluorescence-activated cell sorting (FACS) was then



89 performed using the human anti-S2 antibody CC40.8<sup>39</sup>, with PE anti-human IgG Fc as the  
90 secondary antibody. Four separated gates were set up based on the PE signals, each covering  
91 25% of the entire population (**Figure S1**). The frequency of each mutant among the entire  
92 population was calculated (see Materials and Methods), and a cutoff of 0.0075% was set up to  
93 filter out mutants with potentially noisy measurements. Among the 5,760 missense and nonsense  
94 mutations, 3,999 (69%) of them satisfied the frequency cutoff for downstream analysis. Of note,  
95 the design of our mutant library adopted an internal barcoding strategy that uses synonymous  
96 mutations to facilitate sequencing error correction<sup>40</sup>. As described previously<sup>41</sup>, the expression  
97 score of each mutation was calculated based on their frequency in each of the four gates and  
98 normalized such that the average expression score of silent mutations was 1 and that of nonsense  
99 mutations was 0.

100

101 To evaluate the quality of the deep mutational scanning results, we assessed the expression  
102 score distributions of missense, nonsense, and silent mutations (**Figure S2A**). The difference  
103 between the expression scores of silent mutations and nonsense mutations was apparent and  
104 significant ( $P = 6 \times 10^{-166}$ ), which validated the selectivity of the deep mutational scanning  
105 experiment. Interestingly, silent mutation and missense mutations had similar expression scores,  
106 although the difference is statistically significant ( $P = 2 \times 10^{-5}$ ), indicating that most amino acid  
107 mutations in the NTD did not affect S protein expression. In addition, a Pearson correlation of  
108 0.53 was obtained between the expression scores from two independent biological replicates  
109 (**Figure S2B**), demonstrating the reproducibility of the deep mutational scanning experiment.

110

111 To summarize the expression scores for individual mutations, a heatmap was generated (**Figure**  
112 **1**). We noticed that high-expressing mutations were enriched within the five NTD loop regions  
113 (**Figure S3A**)<sup>12</sup>. High-expressing mutations were also found in residues outside of the loop

114 regions, such as residues S50 and G232. This observation shows that some NTD mutations can  
115 improve the expression of S protein.

116

### 117 **Mutational tolerability has minimal correlation with solvent accessibility**

118 While some residues were enriched in high-expression mutations (see above), others were  
119 enriched in low-expression mutations (e.g. residues D40, L84, and N234) (**Figure 1**).  
120 Consequently, we aimed to identify the biophysical determinants of mutational tolerability in terms  
121 of S protein expression. For each residue, we defined the mutational tolerability as the mean  
122 expression score of mutations. A higher mutational tolerability would indicate the enrichment of  
123 high-expressing mutations at the specified residue. In contrast, a lower mutational tolerability  
124 would indicate the enrichment of low-expressing mutations at the specified residue. A total of 243  
125 NTD residues had six or more mutations with expression score available and were included in  
126 this analysis.

127

128 First, we investigated whether a correlation existed between the mutational tolerability and relative  
129 solvent accessibility (RSA). Since buried residues are typically important for protein folding  
130 stability, residues with a lower RSA are generally expected to have a lower mutational tolerability.  
131 For example, previous deep mutational scanning studies on the RBD have shown a decent  
132 correlation between RSA and mutational tolerability (Spearman correlation = 0.73, **Figure 2A**)<sup>34,42</sup>.  
133 In contrast, the mutational tolerability of NTD residues had a much weaker correlation with RSA  
134 (Spearman correlation = 0.19, **Figure 2B**). These observations indicate that the folding stability  
135 of NTD does not have a strong influence on its mutational tolerability, and hence the S expression  
136 level.

137

138 To investigate whether the mutational tolerability correlated with sequence conservation, we then  
139 analyzed the NTD sequences of 27 sarbecovirus strains, including SARS-CoV-2. Less conserved

140 residues tended to have a higher mutational tolerability, while more conserved residues tended  
141 to have a lower mutational tolerability, although the correlation was not strong (Spearman  
142 correlation = -0.30) (**Figure 2C**). In comparison, the correlation between sequence conservation  
143 and RSA was even weaker (Spearman correlation = -0.16, **Figure 2D**).

144

### 145 **Mutational tolerability correlates with distance to RBD/S2**

146 We further calculated the distance from each NTD residue to RBD/S2 of the S protein. A positive  
147 correlation was observed between the mutational tolerability and the distance to RBD/S2  
148 (Spearman correlation = 0.56) (**Figure 2E**). In other words, the more distant an NTD residue was  
149 from the RBD/S2, the higher the mutational tolerability was. Such correlation was apparent when  
150 the mutational tolerability of each NTD residue was projected on the S protein structure (**Figure**  
151 **2G**). Consistently, the epitopes of two cross-neutralizing antibodies, namely C1717 and C1791,  
152 were significantly closer to RBD/S2 ( $P \leq 5 \times 10^{-4}$ ) and had lower mutational tolerability ( $P \leq 0.01$ )  
153 when compared to the rapidly evolving NTD antigenic supersite (**Figure 2F and Figure**  
154 **S3B**)<sup>14,16,43</sup>.

155

### 156 **Two buried NTD mutations increase S protein expression**

157 While NTD residues adjacent to RBD/S2 typically had a low mutational tolerability, S50 and G232  
158 were two exceptions (**Figure 2G**). For example, mutations S50G and G232E had a high  
159 expression score in our deep mutational scanning results. To validate this finding, we used the  
160 same landing pad system to construct HEK293T cell lines that stably expressed S50Q, G232E,  
161 and S50Q/G232E double mutant. As quantified by flow cytometry analysis (**Figure 3A and Figure**  
162 **S4**), the expression level of S50Q and G232E increased from wild type (WT) by 1.7-fold ( $P =$   
163  $0.002$ ) and 1.5-fold ( $P = 9 \times 10^{-4}$ ), respectively, whereas that of S50Q/G232E increased by 2.5-  
164 fold ( $P = 2 \times 10^{-6}$ ).

165

166 To probe the structural impact of S50Q and G232E, we analyzed their local environments on the  
167 structure of S protein and performed structural modelling using Rosetta (**Figure 3C-D**)<sup>44–46</sup>. S50  
168 forms a hydrogen bond with K304 and is proximal to the S2 subunit. Structural modelling showed  
169 that S50Q not only is able to maintain the hydrogen bond with K304, but also strengthens the van  
170 der Waals interaction between the NTD and S2 by pushing K304 towards S2 from the adjacent  
171 protomer (**Figure 3C**). G232 is proximal to a positively charged region on the RBD that is featured  
172 by R355 and R466 (**Figure 3D**). Structural modeling suggested that G232E could form favorable  
173 electrostatic interactions with both R355 and R466. We further recombinantly expressed these  
174 mutants and tested their thermostability using a thermal shift assay (**Figure 3B**). Of note, all the  
175 recombinantly expressed S proteins contained K986P/V987P mutations in the S2 subunit, which  
176 are known to stabilize the prefusion conformation and increase expression<sup>26,47</sup>. The melting  
177 temperatures of WT and NTD mutants were almost identical at a  $T_m$  of 46 °C to 46.5 °C. These  
178 observations indicate that despite both S50Q and G232E improve the interaction between NTD  
179 and the rest of the S protein, they have minimal impact on the global folding stability of the S  
180 protein.

181

### 182 **S50Q and G232E have minimal effects on the fusion activity and antigenicity**

183 To understand the functional consequences of S50Q and G232E, we further tested whether S50Q,  
184 G232E, and S50Q/G232E exhibited a change in fusion activity compared the WT. A fluorescence-  
185 based cell-cell fusion assay that relied on the split mNeonGreen2 (mNG2)<sup>48</sup> was performed (see  
186 Materials and Methods, **Figure S5**). Briefly, HEK293T landing pad cells that expressed human  
187 ACE2 (hACE2) and mNG2<sub>1-10</sub> were mixed with HEK293T landing pad cells that expressed S  
188 proteins and mNG2<sub>11</sub>. Green fluorescence due to mNG2 complementation was generated when  
189 fusion between the two cell lines occurred. Fluorescence microscopy analysis showed that all  
190 mutants facilitated hACE2-mediated fusion (**Figure 4A-B**). Consistently, flow cytometry analysis  
191 at both 3-hour and 24-hour post-mixing indicated that none of the tested mutants diminished the

192 fusion activity when compared to WT (**Figure 4C-D**). At 3-hour post-mixing, both S50Q (24%, P  
193 = 0.03) and G232E (25%, P = 0.01) showed mild, yet significant, increases in fusion activity  
194 compared to WT. Similarly, at 24-hour post-mixing, S50Q (19%, P = 0.01), G232E (13%, P =  
195 0.02), and S50Q/G232E double mutant (37%, P = 0.005) all showed an increase in fusion activity  
196 compared to WT. Such a mild increase in fusion activity may simply be attributed to the higher  
197 expression level of the mutants. Negative control cells expressing the K986P/V987P double  
198 mutant, which is known to stabilize the prefusion form of the S protein<sup>26,47</sup>, did not show any fusion  
199 activity (**Figure 4A-D**).

200

201 We then proceeded to investigate whether S50Q, G232E, and S50Q/G232E alter the antigenicity  
202 of the S protein. The binding of three antibodies targeting different domains of the S protein were  
203 tested, namely CC12.3 (anti-RBD)<sup>49</sup>, S2M28 (anti-NTD)<sup>14</sup>, and COVA1-07 (anti-S2)<sup>50</sup>. Flow  
204 cytometry analysis showed that all three antibodies bound to the tested mutants at a similar level  
205 as WT (**Figure 5 and Figure S6**), indicating that S50Q, G232E, and S50Q/G232E did not alter  
206 the structural conformation and antigenicity of the S protein.

207

## 208 **DISCUSSION**

209 S protein is central to the research of SARS-CoV-2 evolution and COVID-19 vaccines<sup>51-54</sup>. While  
210 both the RBD and the NTD on the S protein are targets of neutralizing antibodies and involve in  
211 the antigenic drift of SARS-CoV-2<sup>43,55-61</sup>, the NTD often receives less attention than the RBD.  
212 Using deep mutational scanning, this study shows that many NTD mutations at buried residues  
213 do not affect S protein expression. At the same time, the closer an NTD mutation is to RBD/S2,  
214 the more likely it is detrimental to S protein expression. These observations imply that for optimum  
215 S protein expression, the structural stability at the NTD-RBD and the NTD-S2 interfaces is more  
216 critical than the folding stability of the NTD. Our results also at least partly explain why the N1 to  
217 N5 loops, which contain the NTD antigenic supersite<sup>62</sup> and are far from the NTD-RBD/S2

218 interfaces, are highly diverse among SARS-CoV-2 variants and sarbecovirus strains. Overall, this  
219 study provides crucial biophysical insights into the evolution of the NTD.

220

221 NTD mutations S50Q and G232E, which locate at the interdomain interface and increase S  
222 protein expression, represent another important finding of this study. Engineering high expressing  
223 S protein can lower the production cost of recombinant COVID-19 vaccine and may improve the  
224 effectiveness of mRNA vaccines<sup>25</sup>. Similar to certain previously characterized mutations in the  
225 S2<sup>26,27</sup>, S50Q and G232E in the NTD increase the expression yield of the S protein without  
226 changing its  $T_m$ . Consistently, a recent study showed that NTD mutations in BA.1 improve the  
227 expression of S protein without increasing its thermostability<sup>63</sup>. Furthermore, S50Q and G232E  
228 are not solvent exposed on the S protein surface and do not seem to alter the antigenicity of the  
229 S protein. Of note, according to our deep mutational scanning data, S50Q and G232E are just  
230 two of many mutations that enhance S protein expression. Therefore, although most studies on  
231 S-based immunogen design focus on the mutations in the RBD and S2<sup>7,26-29</sup>, our results suggest  
232 that mutations in NTD can provide a complementary strategy.

233

234 We acknowledge that S protein expression level does not necessarily correlate with virus  
235 replication fitness. For example, NTD mutations that do not affect the S protein expression may  
236 be detrimental to the replication fitness of SARS-CoV-2, due to negative impact on NTD  
237 functionality. While the functional importance of the NTD in natural infection remains largely  
238 unclear, NTD has been proposed to facilitate virus entry by interacting with DC-SIGN, L/SIGN,  
239 AXL, ASGR1, and KREMEN1<sup>64-66</sup>. Studies have also shown that the NTD can allosterically evade  
240 antibody binding by interacting with a heme metabolite<sup>45</sup>, as well as modulate the efficiency of  
241 virus-host membrane fusion<sup>67,68</sup>. To fully comprehend the biophysical constraints of NTD, future  
242 studies should systematically investigate how different NTD mutations affect virus replication  
243 fitness.

244

## 245 **MATERIALS AND METHODS**

### 246 **Construction of the NTD mutant library**

247 SARS-CoV-2 S NTD mutant library was constructed based on the HEK293T landing pad  
248 system<sup>37,38</sup>. The template for constructing the NTD mutant library was a plasmid that encoded  
249 (from 5' to 3') an attB site, a codon-optimized SARS-CoV-2 S (GenBank ID: NC\_045512.2) with  
250 the PRRA motif in the furin cleavage site deleted, an internal ribosome entry site (IRES), and a  
251 puromycin-resistance marker. This plasmid was used as a PCR template to generate a linearized  
252 vector and a library of mutant NTD inserts. The linearized vector was generated using 5'-TGC  
253 TCG TCT CTA CAA CTC CGC CAG CTT CAG CAC C-3' and 5'-TGC TCG TCT CTT CAC TGG  
254 CCG TCG TTT TAC AAC G-3' as primers. Inserts were generated by two separate batches of  
255 PCRs to cover the entire NTD. The first batch of PCRs consisted of 36 reactions, each containing  
256 one cassette of forward primers as well as the universal reverse primer 5'-TGC TCG TCT CGT  
257 TGT ACA GCA CGG AGT AGT CGG C-3'. Each cassette contained an equal molar ratio of eight  
258 forward primers that had the same 21 nt at the 5' end and 15 nt at the 3' end. Each primer within  
259 a cassette were also encoded with an NNK (N: A, C, G, T; K: G, T) sequence at a specified codon  
260 positions for saturation mutagenesis. In addition, each primer also carried unique silent mutations  
261 (also known as synonymous mutations) to help distinguish between sequencing errors and true  
262 mutations in downstream sequencing data analysis as described previously<sup>40</sup>. The forward  
263 primers, named as CassetteX\_N (X: cassette number, N: primer number), are listed in **Table S1**.  
264 The second batch of PCR consisted of another 36 PCRs, each with a universal forward primer 5'-  
265 TGC TCG TCT CAG TGA ATT GTA ATA CGA CTC ACT A-3' and a unique reverse primer as  
266 listed in **Table S2**. Subsequently, 36 overlapping PCRs were performed using the universal  
267 forward and reverse primers, as well as a mixture of 10 ng each of the corresponding products  
268 from the first and second batches of PCR. The 36 overlap PCR products were then mixed at equal  
269 molar ratio to generate the final insert of the NTD mutant library. All PCRs were performed using



270 PrimeSTAR Max polymerase (Takara Bio) per manufacturer's instruction, followed by purification  
271 using Monarch Gel Extraction Kit (New England Biolabs). The final insert and the linearized vector  
272 were digested by BsmBI-v2 (New England Biolabs) and ligated using T4 DNA Ligase (New  
273 England Biolabs). Ligation product was purified by PureLink PCR Purification Kit (Thermo Fisher  
274 Scientific) and then transformed into MegaX Dh10B T1R cells (Thermo Fisher Scientific). At least  
275 half a million colonies were collected. Plasmid mutant library were purified from the bacteria  
276 colonies using PureLink HiPure Plasmid Midiprep Kit (Invitrogen). All primers in this study were  
277 ordered from Integrated DNA Technologies.

278

### 279 **Construction of stable cell lines using HEK293T landing pad cells**

280 Human embryonic kidney 293T (HEK293T) landing pad cells<sup>37,38</sup> were used to display the NTD  
281 mutant library for deep mutational scanning. Landing pad cells were maintained using complete  
282 growth medium consisting of Dulbecco's Modified Eagle's Medium (DMEM) (Corning), 10% v/v  
283 FBS (VWR), Pen-Strep (Gibco), non-essential amino acid (Gibco), and 2 µg/mL doxycycline. 1.2  
284 µg of plasmid was transfected into  $6 \times 10^5$  landing pad cells. For the deep mutational scanning  
285 experiment, eight transfection reactions were carried out in parallel to minimize loss of mutant  
286 diversity at the transfection step. Transfected cells were then incubated at 37 °C with 5% CO<sub>2</sub>.  
287 After 48 hours, 10 nM AP1903 was supplemented to carry out negative selection. At 72 hours  
288 after the negative selection, positive selection antibiotic (1 µg/mL puromycin for NTD cell lines or  
289 100 µg/mL hygromycin for hACE2 cell lines) was supplemented to the medium to carry out  
290 positive enrichment of cells with successful recombination. Constructed cell lines would remain in  
291 the complete growth medium supplemented with doxycycline and the positive selection antibiotics.

292

### 293 **Sorting the NTD mutant library based on S protein expression level**

294 Four T-75 flasks (Corning) that were 90% confluent with cells that carried the NTD mutant library  
295 were washed with 1× PBS, harvested with warm versene and pelleted via centrifugation at  $300 \times$



296 g for 5 mins at room temperature. Cells were then resuspended in FACS buffer (2% v/v fetal  
297 bovine serum, 5 mM EDTA in DMEM supplemented with glucose, L-glutamine and HEPES but  
298 without phenol red (Gibco)). Subsequently, cells were incubated with 5 µg/mL of CC40.8 at 4 °C  
299 with gentle shaking for 1 hour. Cells were washed once with ice-cold FACS buffer and incubated  
300 with 1 µg/mL PE anti-human IgG Fc (Biolegend) at 4 °C with gentle shaking in the dark for 1 hour.  
301 Cells were washed once and resuspended in ice-cold FACS buffer. Cells were then filtered using  
302 a 40 µm cell strainer (VWR) before cell sorting. FACS were performed using a BD FACSAria II  
303 cell sorter (BD) with a 561 nm laser and a 582/15 bandpass filter. Cells were collected into ice-  
304 cold D10 medium (Dulbecco's modified Eagle medium with 4.5 g/L glucose, 4 mM L-glutamine  
305 and 110 mg/L sodium pyruvate (Corning), supplemented with 10% v/v fetal bovine serum (VWR),  
306 1× penicillin-streptomycin (Gibco), 1× non-essential amino acids (Gibco)) and binned into no (bin  
307 0), low (bin 1), medium (bin 2) and high (bin 3) expression according to PE signal, where each  
308 bin contains 25% of the singlet population (**Figure S1**). A biological replicate of the deep  
309 mutational scanning experiment was performed, starting from the transfection step.

310

### 311 **Next-generation sequencing of the NTD mutant library**

312 Sorted cells from each bin were pelleted at 300 × g, 4 °C for 15 mins and then resuspended in  
313 200 µL PBS (Corning). Genomic DNA extraction was then performed using DNA Blood and  
314 Tissue Kit (QIAGEN) according to the manufacturer's instructions with a modification: cells were  
315 incubated at 56 °C for 30 min instead of 10 min. The NTD mutant library was amplified from the  
316 genomic DNA in two non-overlapping fragments using KOD DNA polymerase (MilliporeSigma)  
317 per manufacturer's instruction with the following two primer sets, respectively (also see **Table S3**).  
318 Set 1: 5'- CAC TCT TTC CCT ACA CGA CGC TCT TCC GAT CTC TGC TGC CTC TGG TGT  
319 CCA GC-3' (NTD-DMS-recover-1F) and 5'-GAC TGG AGT TCA GAC GTG TGC TCT TCC GAT  
320 CTG TTG GCG CTG CTG TAC ACC CG-3' (NTD-DMS-recover-1R)

321 Set 2: 5'-CAC TCT TTC CCT ACA CGA CGC TCT TCC GAT CTA GCT GGA TGG AAA GCG  
322 AGT TC-3' (NTD-DMS-recover-2F) and 5'-GAC TGG AGT TCA GAC GTG TGC TCT TCC GAT  
323 CTC ACG GTG AAG GAC TTC AGG GT-3' (NTD-DMS-recover-2R)

324 A second round of PCR was carried out to add the adapter sequence and index to the amplicons  
325 as described previously<sup>69</sup>. The final PCR products were submitted for next-generation sequencing  
326 using Illumina MiSeq PE300.

327

### 328 **Analysis of next-generation sequencing data**

329 Next-generation sequencing data were obtained in FASTQ format. Forward and reverse reads of  
330 each paired-end read were merged by PEAR<sup>70</sup>. The merged reads were parsed by SeqIO module  
331 in BioPython<sup>71</sup>. Primer sequences were trimmed from the merged reads. Trimmed reads with  
332 lengths inconsistent with the expected length were discarded. The trimmed reads were then  
333 translated to amino acid sequences, with sequencing error correction performed at the same time  
334 as previously described<sup>40</sup>. Amino acid mutations were called by comparing the translated reads  
335 to the WT amino acid sequence. Frequency ( $F$ ) of a mutant  $i$  at position  $s$  within bin  $n$  of replicate  
336  $k$  was computed for each replicate as follows:

$$337 \quad F_{i,s,n,k} = \frac{\text{readcount}_{i,s,n,k+1}}{\sum_s \sum_i (\text{readcount}_{i,s,n,k+1})} \quad (1)$$

338 A pseudocount of 1 was added to the read counts of each mutant to avoid division by zero in  
339 subsequent steps. We then calculated the total frequency ( $F_{total}$ ) of mutant  $i$  at position  $s$  as follows:

$$340 \quad F_{total,i,s} = \frac{\sum_{k=1}^2 \sum_{n=0}^3 F_{i,s,n,k}}{8} \quad (2)$$

341 Mutants with a  $F_{total}$  of equal or greater than 0.0075% were selected for downstream analysis.  
342 Subsequently, the weighted average ( $W$ ) of each mutant among 4 bins (bin 0 to bin 3) in each  
343 replicate was computed as described previously<sup>41</sup>:

344 
$$W_{i,s,k} = \frac{F_{i,s,0,k} \times 0.25 + F_{i,s,1,k} \times 0.5 + F_{i,s,2,k} \times 0.75 + F_{i,s,3,k} \times 1}{\sum_{n=0}^3 F_{i,s,n,k}} \quad (3)$$

345 Selected mutants were then categorized based on the mutation types (missense, nonsense, and  
346 silent). The mean value of weighted average for nonsense as well as silent mutations were  
347 calculated. Expression score (*ES*) of a mutant *i* at position *s* of replicate *k* was calculated as  
348 described previously<sup>41</sup>:

349 
$$ES_{i,s,k} = \frac{W_{i,s,k} - \overline{W_{nonsense,k}}}{\overline{W_{silent,k}} - \overline{W_{nonsense,k}}} \quad (4)$$

350 Final expression score of a mutant *i* at position *s* was calculated by taking the average of the  
351 expression scores between replicates. Mutational tolerability of position *s* was then calculated by  
352 taking the average of the expression scores of all mutants at that position:

353 
$$mutational\ tolerability_s = \frac{\sum_{i \in s} ES_{i,s}}{\sum_{i \in s}} \quad (5)$$

354

### 355 **Structural analysis of deep mutational scanning results**

356 DSSP<sup>72,73</sup> was used to calculate the solvent exposure surface area (SASA) of each residue in  
357 NTD and RBD on the S trimer (PDB 6ZGE)<sup>44</sup>. Deep mutational scanning result of RBD was  
358 extracted from a previous study<sup>42</sup>. Relative solvent accessibility (RSA) was computed by dividing  
359 the SASA by the theoretical maximum allowed solvent accessibility of the corresponding amino  
360 acid<sup>74</sup>.

361

362 Each NTD residue's distance to RBD/S2 was calculated based on the S trimer structure (PDB  
363 6ZGE)<sup>44</sup> with the NTD replaced by the high resolution crystal structure (PDB 7B62)<sup>45</sup>. For each  
364 NTD residue, the distances to all RBD and S2 residues were measured. The shortest distance  
365 was then recorded as the "distance to RBD/S2". Residue-residue distance was defined as the  
366 distance between the centroid coordinates of two residues.

367

368 To visualize the mutational tolerability of each NTD residue, the crystal structure of SARS-CoV-2  
369 S protein NTD (PDB 7B62) was used<sup>45</sup>. The NTD crystal structure was then aligned with the S  
370 trimer to generate the figures (PDB 6ZGE)<sup>44</sup>.

371

### 372 **NTD sequence conservation analysis**

373 The sequence conservation analysis of NTD was based on 27 sarbecovirus strains (**Table S6**)<sup>1,75–</sup>  
374 <sup>79</sup>. S sequences of these stains were retrieved from GenBank and Global Initiative for Sharing  
375 Avian Influenza Data (GISAID)<sup>80</sup>. Their NTD sequences were then identified using tBlastn search  
376 using the amino acid sequence of SARS-CoV-2 Hu-1 NTD (Gene ID: 43740568) as the query  
377 sequence. The BlastXML output of the tBlastn was then parsed and used as the input for multiple  
378 sequence alignment using MAFFT<sup>81,82</sup>. For each residue position, sequence conservation was  
379 defined as the proportion of strains that contains the same amino acid variant as SARS-CoV-2  
380 Hu-1.

381

### 382 **Rosetta-based mutagenesis**

383 The structure of the spike protein was obtained from Protein Data Bank (PDB 6ZGE)<sup>44</sup>. Water  
384 molecules and N-acetyl-D-glucosamine were removed using PyMOL (Schrödinger). Then, the  
385 amino acids were renumbered using pdb-tools<sup>83</sup>. Fixed backbone point-mutagenesis for S50Q  
386 and G232E was performed using the 'fixbb' application in Rosetta (RosettaCommons). One-  
387 hundred poses were generated for each mutagenesis. Using the lowest-scoring structure from  
388 fixed backbone mutagenesis as input, a constraint file was obtained using the minimize\_with\_cst  
389 application in Rosetta. Fast relax was then performed via the 'relax' application in Rosetta<sup>46</sup> with  
390 the corresponding constraint file. The lowest-scoring structure out of eight was then used for  
391 structural analysis. Code and source files for structural modelling are available in  
392 [https://github.com/nicwulab/SARS-CoV-2\\_NTD\\_DMS/tree/main/rosetta](https://github.com/nicwulab/SARS-CoV-2_NTD_DMS/tree/main/rosetta).

393

#### 394 **Split mNeonGreen2-based cell-cell fusion assay**

395 Human ACE2 (hACE2) construct was constructed in a previous study<sup>38</sup>. A split mNeonGreen2  
396 (mNG2) reporter system was integrated into the S plasmid (see above) and the hACE2 plasmid<sup>48</sup>.  
397 Specifically, a gene fragment that encoded (from 5' to 3') a GCN4 leucine zipper, a GS linker,  
398 mNG2<sub>1-10</sub>, and a 2A self-cleaving peptide was inserted into the hACE2 plasmid between the IRES  
399 and the hygromycin resistance marker. Similarly, a gene fragment that encodes (from 5' to 3') a  
400 GCN4 leucine zipper, a GS linker, mNG2<sub>11</sub>, and a 2A self-cleaving peptide was inserted into the  
401 S plasmid between the IRES and the puromycin resistance marker. Each plasmid construct was  
402 transfected and recombined into HEK293T landing pad cells per steps described above.

403

404 Once the stable cell lines were created,  $5 \times 10^5$  landing pad cells expressing hACE2 with mNG2<sub>1-</sub>  
405 <sub>10</sub> were seeded in 6-well plates (Fisher Scientific). The cells were then then incubated at 37 °C  
406 with 5% CO<sub>2</sub> for 15 mins to allow seeding. Subsequently,  $5 \times 10^5$  landing pad cells expressing the  
407 S with mNG2<sub>11</sub> were then added dropwise to the seeded hACE2 cells. Both cells were filtered  
408 through 40 µm cell strainer (VWR) prior to seeding. At 3-hour and 24-hour post-mixing, fusion  
409 events in each well were qualitatively assessed with an ECHO Revolve epifluorescence  
410 microscope (ECHO) in inverted format. Overlaid images were captured on white light and FITC  
411 filter channels using an UPlanFL N 10X/0.30NA objective (Olympus) with identical light intensity  
412 and exposure settings for all conditions. Cells in each well were then collected using 0.5 mM  
413 EDTA, pelleted via centrifugation at  $300 \times g$  for 5 mins at room temperature, and resuspended in  
414 the FACS buffer. LSRII flow cytometry (BD) was used to quantify the fusion events of each sample.  
415 Negative controls were measured first to set up proper gating strategies (**Figure S5**). Then, the  
416 flow cytometry analysis was performed on  $10^5$  live cells for each sample. Data were analyzed

417 using FCS Express 6 software (De Novo Software). The percentage of mNG2 positive population  
418 of each sample were used for normalization (**Table S4**).

419

#### 420 **Flow cytometry analysis for the protein expression assay and antibody binding assay**

421 Approximately  $1 \times 10^6$  cells that carried the selected SARS-CoV-2 S NTD mutant were washed  
422 with  $1 \times$  PBS, harvested with warm versene and pelleted via centrifugation at  $300 \times g$  for 5 mins  
423 at room temperature. The cells were resuspended in the FACS buffer. Subsequently, cells were  
424 incubated with  $5 \mu\text{g/mL}$  of the selected antibodies at  $4^\circ\text{C}$  with gentle shaking for 1 hour. Cells  
425 were then washed once with ice-cold FACS buffer and incubated with  $2 \mu\text{g/mL}$  PE anti-human  
426 IgG Fc (BioLegend) at  $4^\circ\text{C}$  with gentle shaking in the dark for 1 hour. Cells were washed once,  
427 pelleted via centrifugation at  $300 \times g$  for 5 mins at room temperature, and resuspended in ice-cold  
428 FACS buffer. LSRII flow cytometry (BD) was used to measure the PE signal of each sample.  
429 Negative controls were measured first to set up proper gating strategies (**Figure S4 and S6**).  
430 Then, the flow cytometry analysis was performed on  $10^5$  singlets for each sample. Data were  
431 analyzed using FCS Express 6 software (De Novo Software).

432

#### 433 **Normalization of the expression assay results**

434 The mean fluorescence intensity (MFI) of the entire population was recorded for each sample,  
435 followed by the normalization as previously described<sup>42</sup>. For a given sample  $i$ , the following  
436 equation was used to compute the normalized expression ( $NE$ ):

$$437 \quad NE = \frac{MFI_i - MFI_{negative\ control}}{MFI_{wildtype} - MFI_{negative\ control}} \quad (6)$$

438 Normalizations were performed for each sample within a given biological replicate (**Table S4**).

439

#### 440 **Recombinant expression and purification of soluble S protein**

441 SARS-CoV-2 S ectodomain with the PRRA motif in the furin cleavage site deleted and mutations  
442 K986P/V987P, which are known to stabilize the prefusion conformation and increase  
443 expression<sup>26,47</sup>, was cloned into a pHCMV3 vector. The S ectodomain construct contained a  
444 trimerization domain and a 6×His-tag at the C-terminal. Expi293F cells (Gibco), which were  
445 maintained using Expi293 expression medium (Gibco), were used to express soluble S protein.  
446 Briefly, 20 µg of the plasmid was transfected into 20 mL of Expi293F cells at  $3 \times 10^6$  cells mL<sup>-1</sup>  
447 using ExpiFectamine 293 Transfection Kit (Thermo Fisher Scientific) following the manufacturer's  
448 instructions. Transfected cells were then incubated at 37 °C, 8% CO<sub>2</sub> and shaking at 125 rpm for  
449 6 days. Cell cultures were then harvested and centrifuged at 4000 × g at 4 °C for 15 mins. The  
450 supernatant was clarified using a 0.22 µm polyethersulfone filter (Millipore). S protein in the  
451 clarified supernatant was then purified using Nickel Sepharose Excel resin (Cytiva), with 20 mM  
452 imidazole in PBS as wash buffer, and 300 mM imidazole in PBS as elution buffer. Three rounds  
453 of 2 mL elutions were performed. The eluted protein was then concentrated and analyzed by  
454 SDS-PAGE reducing gels (Bio-Rad) (**Figure S7A**). Concentrated protein solution was further  
455 purified using Superdex 200 XK 16/100 size exclusion column (Cytiva) in 20 mM Tris-HCl pH 8.0  
456 and 150 mM NaCl (**Figure S7B**). Selected elution fractions were combined and concentrated.  
457 Final protein concentration was measured using NanoDrop One (Thermo Fisher Scientific).

458

#### 459 **Protein thermostability assay**

460 5 µg of purified protein was mixed with 5× SYPRO orange (Thermo Fisher Scientific) in 20 mM  
461 Tris-HCl pH 8.0, 150 mM NaCl at a final volume of 25 µL. The sample mixture was then transferred  
462 into an optically clear PCR tube (VWR). SYPRO orange fluorescence data in relative fluorescence  
463 unit (RFU) was collected from 10 °C to 95 °C using CFX Connect Real-Time PCR Detection  
464 System (Bio-Rad). The temperature corresponding to the lowest point of the first derivative,

465  $-d(\text{RFU})/dT$ , was defined as the melting temperature ( $T_m$ ). Data were analyzed using OriginPro  
466 2020b (Origin Lab). Raw data are shown in **Table S5**.

467

#### 468 **Code availability**

469 Custom python and R scripts for data analysis and plotting in this study have been deposited to  
470 [https://github.com/nicwulab/SARS-CoV-2\\_NTD\\_DMS](https://github.com/nicwulab/SARS-CoV-2_NTD_DMS).

471

#### 472 **Data availability**

473 Raw sequencing data have been submitted to the NIH Short Read Archive under accession  
474 number: BioProject PRJNA792013. Biological materials including plasmids, constructed NTD  
475 mutant library as well as individual HEK293T landing pad cell lines are available by contacting  
476 the corresponding author (N.C.W.). Source data are provided with this paper.

477

#### 478 **ACKNOWLEDGEMENT**

479 We thank Meng Yuan, Huibin Lv, and Qi Wen Teo for helpful discussion and the Roy J. Carver  
480 Biotechnology Center at the University of Illinois at Urbana-Champaign for assistance with  
481 fluorescence-activated cell sorting and next-generation sequencing. This work was supported by  
482 National Institutes of Health (NIH) R00 AI139445 (N.C.W.), DP2 AT011966 (N.C.W.), R01  
483 AI167910 (N.C.W.), the Michelson Prizes for Human Immunology and Vaccine Research  
484 (N.C.W.).

485

#### 486 **AUTHOR CONTRIBUTIONS**

487 W.O.O, T.J.C.T., and N.C.W. conceived and designed the study. G.S. and R.A. provided the  
488 CC40.8 antibody. K.A.M. provided the HEK293T landing pad cell line and assisted in experimental  
489 design. W.O.O and T.J.C.T. performed the deep mutational scanning and flow cytometry  
490 experiments. T.J.C.T. performed structural modelling using Rosetta. W.O.O, T.J.C.T., and R.L.



491 expressed and purified the recombinant proteins. W.O.O, T.J.C.T., and C.K. performed the  
492 microscopy analysis. W.O.O, T.J.C.T., and N.C.W. performed data analysis. W.O.O., T.J.C.T.  
493 and N.C.W. wrote the paper and all authors reviewed and/or edited the paper.

494

495 **COMPETING INTERESTS**

496 The authors declare no competing interests.

497 FIGURES

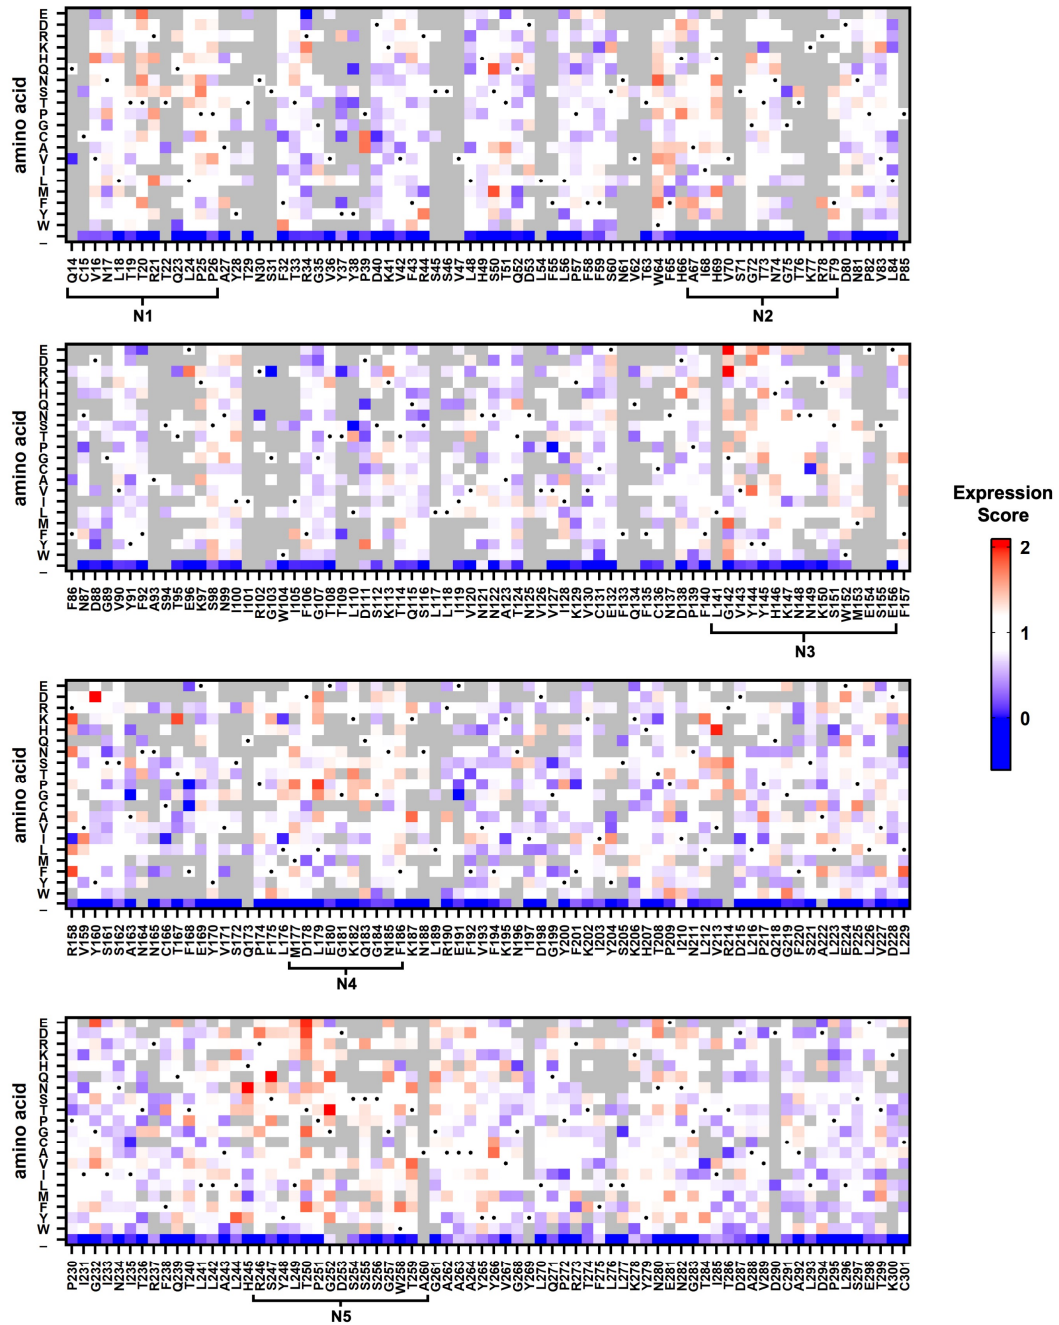

498

499 **Figure 1. Effects of NTD single mutations on S protein expression.** The expression scores

500 of individual NTD mutations are shown as a heatmap. X-axis represents the residue position. Y-

501 axis represents different amino acids as well as the stop codon (␣). Amino acids corresponding

502 to the WT sequence are indicated by the black dots. Mutations with a total frequency of <0.0075%  
503 were excluded from the analysis and shown in grey. Regions corresponding to the N1-N5 loops  
504 were defined as previously described<sup>12</sup>.

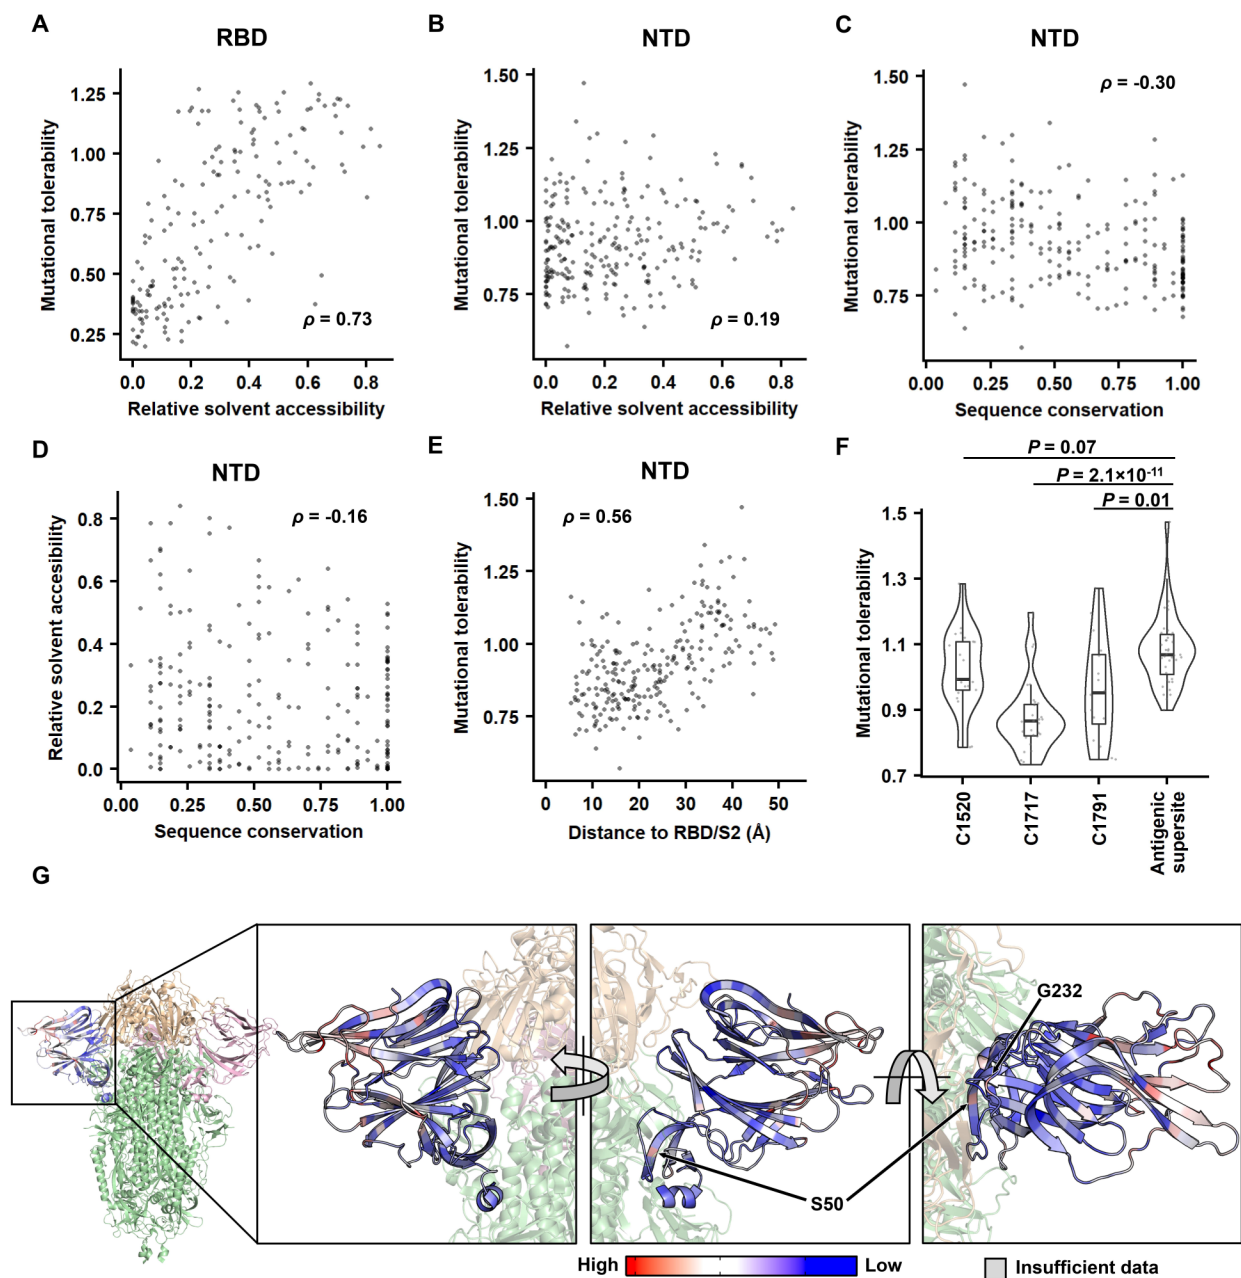

505

506 **Figure 2. identifying the biophysical determinants of mutational tolerability. (A-B)** The

507 relationship between relative solvent accessibility (RSA) and the mutational tolerability is shown

508 for **(A)** RBD and **(B)** NTD. The deep mutational scanning data on RBD expression was from a

509 previous study<sup>42</sup>. **(C-D)** The relationship between sequence conservation among 27 sarbecovirus

510 strains **(Table S6)** and **(C)** the mutational tolerability, or **(D)** RSA of each NTD residue is shown.

511 **(E)** The relationship between the distance to RBD/S2 and the mutational tolerability of each NTD  
512 residue is shown. **(A-E)** Each datapoint represents one residue. The Spearman's rank correlation  
513 coefficient ( $\rho$ ) is indicated. **(F)** The mutational tolerability of residues within the cross-neutralizing  
514 NTD antibody epitopes (C1520, C1717, C1791)<sup>16</sup> is compared to that within the antigenic  
515 supersite<sup>14</sup> using a violin plot. Each datapoint represents one residue. P-values were computed  
516 by two-tailed t-test. **(G)** The mutational tolerability of each NTD residue is projected on one NTD  
517 of the S trimer structure (PDB 6ZGE<sup>44</sup> and PDB 7B62<sup>45</sup>). Red indicates residues with higher  
518 mutational tolerability, while blue indicates residues with lower mutational tolerability. Residues  
519 with insufficient data to calculate mutational tolerability are colored in grey. Two residues of  
520 interests, namely S50 and G232, are indicated. RBDs are colored in wheat, the two other NTDs  
521 are in pink, and the rest of the S1 and S2 subunits are in green.

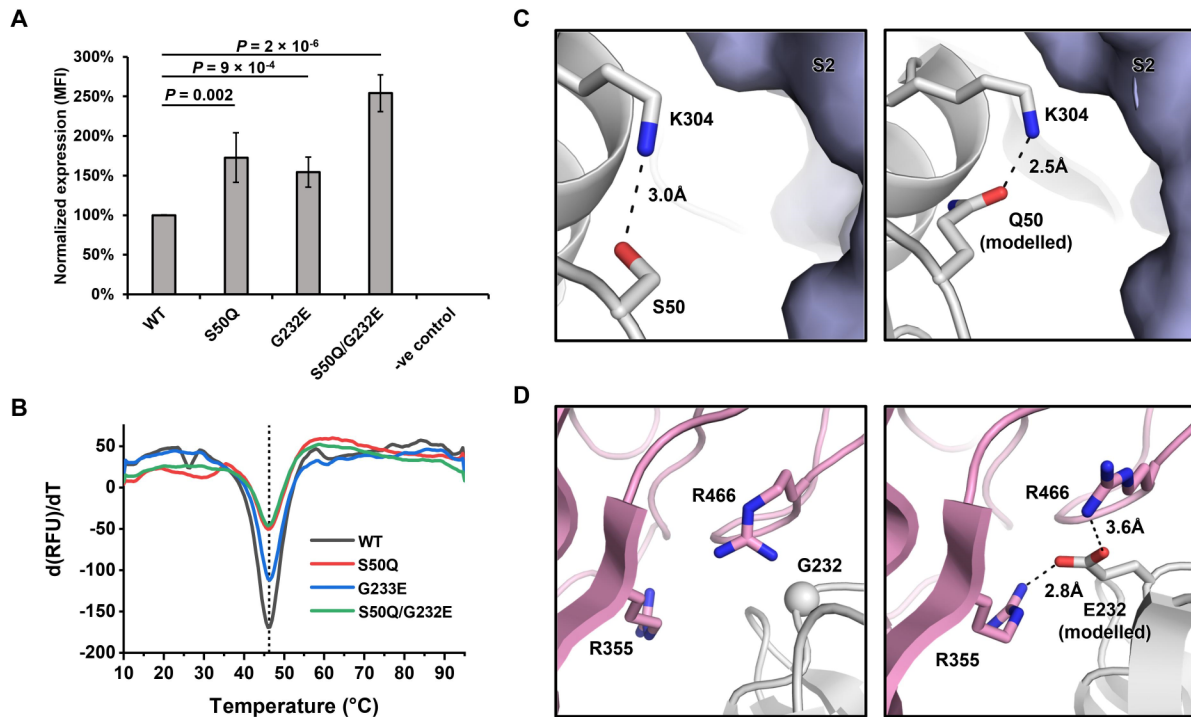

522

523 **Figure 3. S50Q and G232E at the interdomain interface increase S protein expression. (A)**

524 Cell surface S protein expression of WT and NTD mutants was quantified using flow cytometry

525 analysis with CC40.8 as the primary antibody. Untransfected HEK293T landing pad cells were

526 used as a negative control (-ve control). S protein expression level was defined as the mean

527 fluorescence intensity (MFI) of the positive gated population. S protein expression level was

528 normalized to WT. The error bar indicates the standard deviation of six independent experiments.

529 P-values were computed by two-tailed t-test. **(B)** Thermostability of WT S protein and selected

530 NTD mutants was measured using differential scanning fluorimetry. The black vertical dotted line

531 indicates the melting temperature of WT ( $T_m = 46.2^\circ\text{C}$ ). **(C-D)** Rosetta-based structural modelling

532 of **(C)** S50Q and **(D)** G232E was performed using the structure of S protein (PDB 6ZGE)<sup>45</sup>. The

533 three protomers of the S protein are colored in white, light blue, and pink. Potential interactions

534 are represented by black dashed lines with distance labeled.



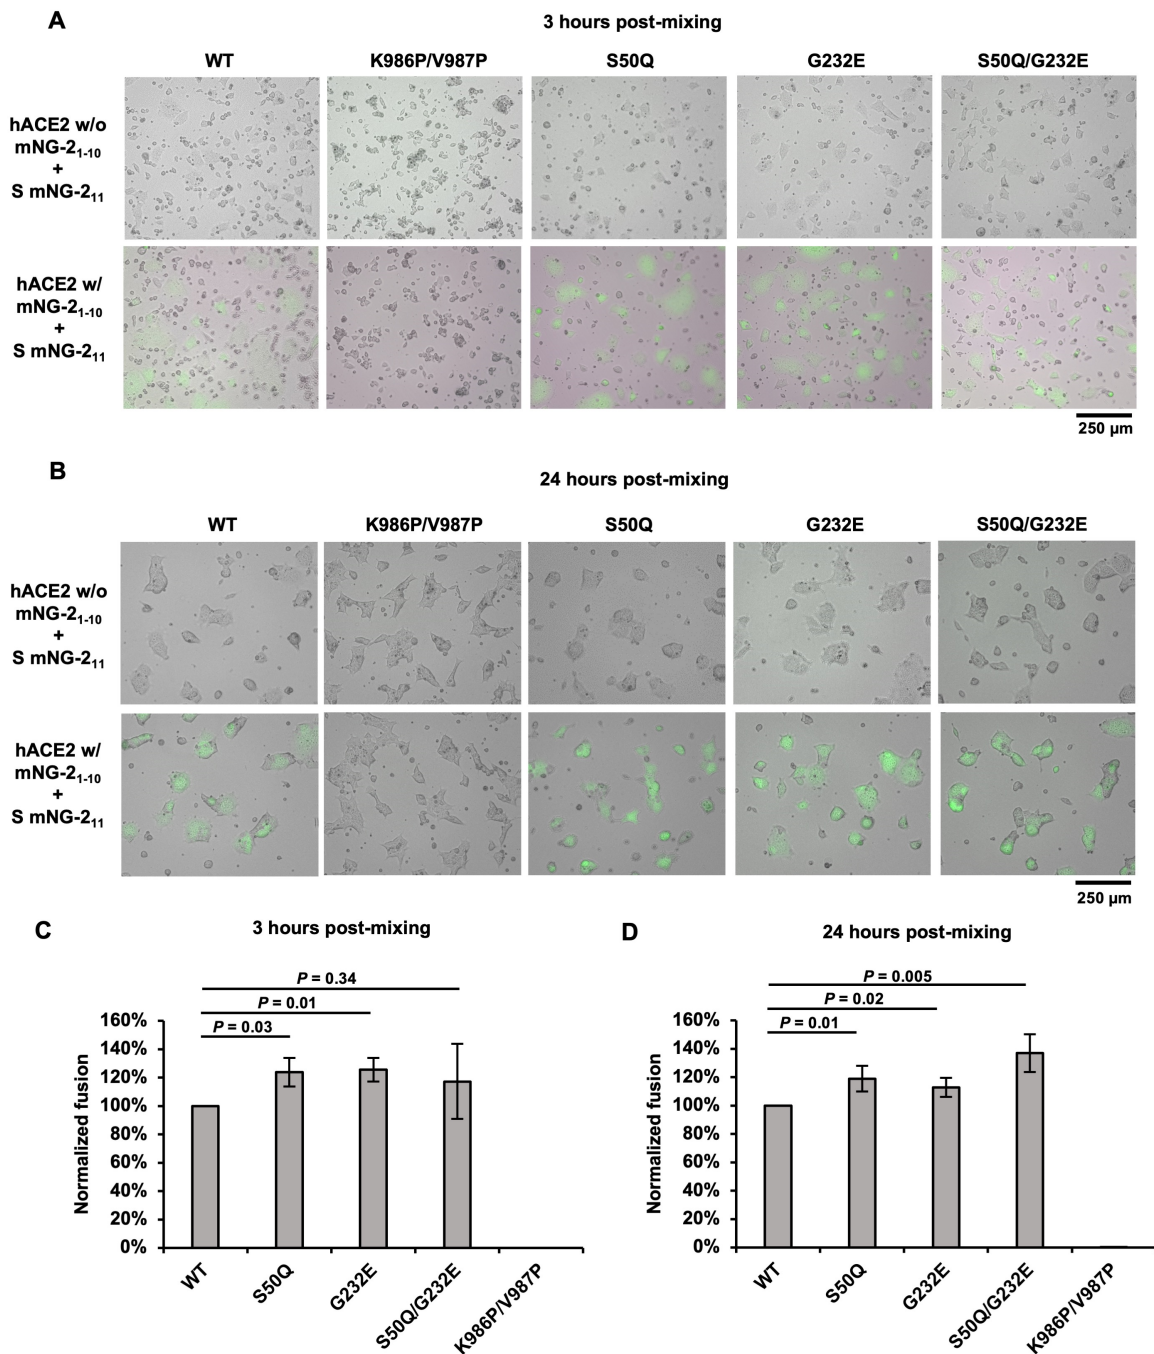

535

536 **Figure 4. S50Q, G232E, and S50Q/G232E do not diminish fusion activity. (A-B)** Fluorescence

537 microscopy analysis of the fusion events at **(A)** 3-hour and **(B)** 24-hour post-mixing of cells

538 expressing S and mNG2<sub>11</sub> (S cells) and cells expressing hACE2 and mNG2<sub>1-10</sub> (hACE2 cells).

539 Cells with green fluorescence signals are the fused cells. Scale bars are shown at the bottom

540 right corner. **(C-D)** Fusion activity of WT and selected NTD mutants at **(C)** 3-hour and **(D)** 24-hour  
541 post-mixing was quantified using flow cytometry analysis. Fusion activity was normalized to WT.  
542 The error bar indicates the standard deviation of at least four independent experiments. P-values  
543 were computed by two-tailed t-test.



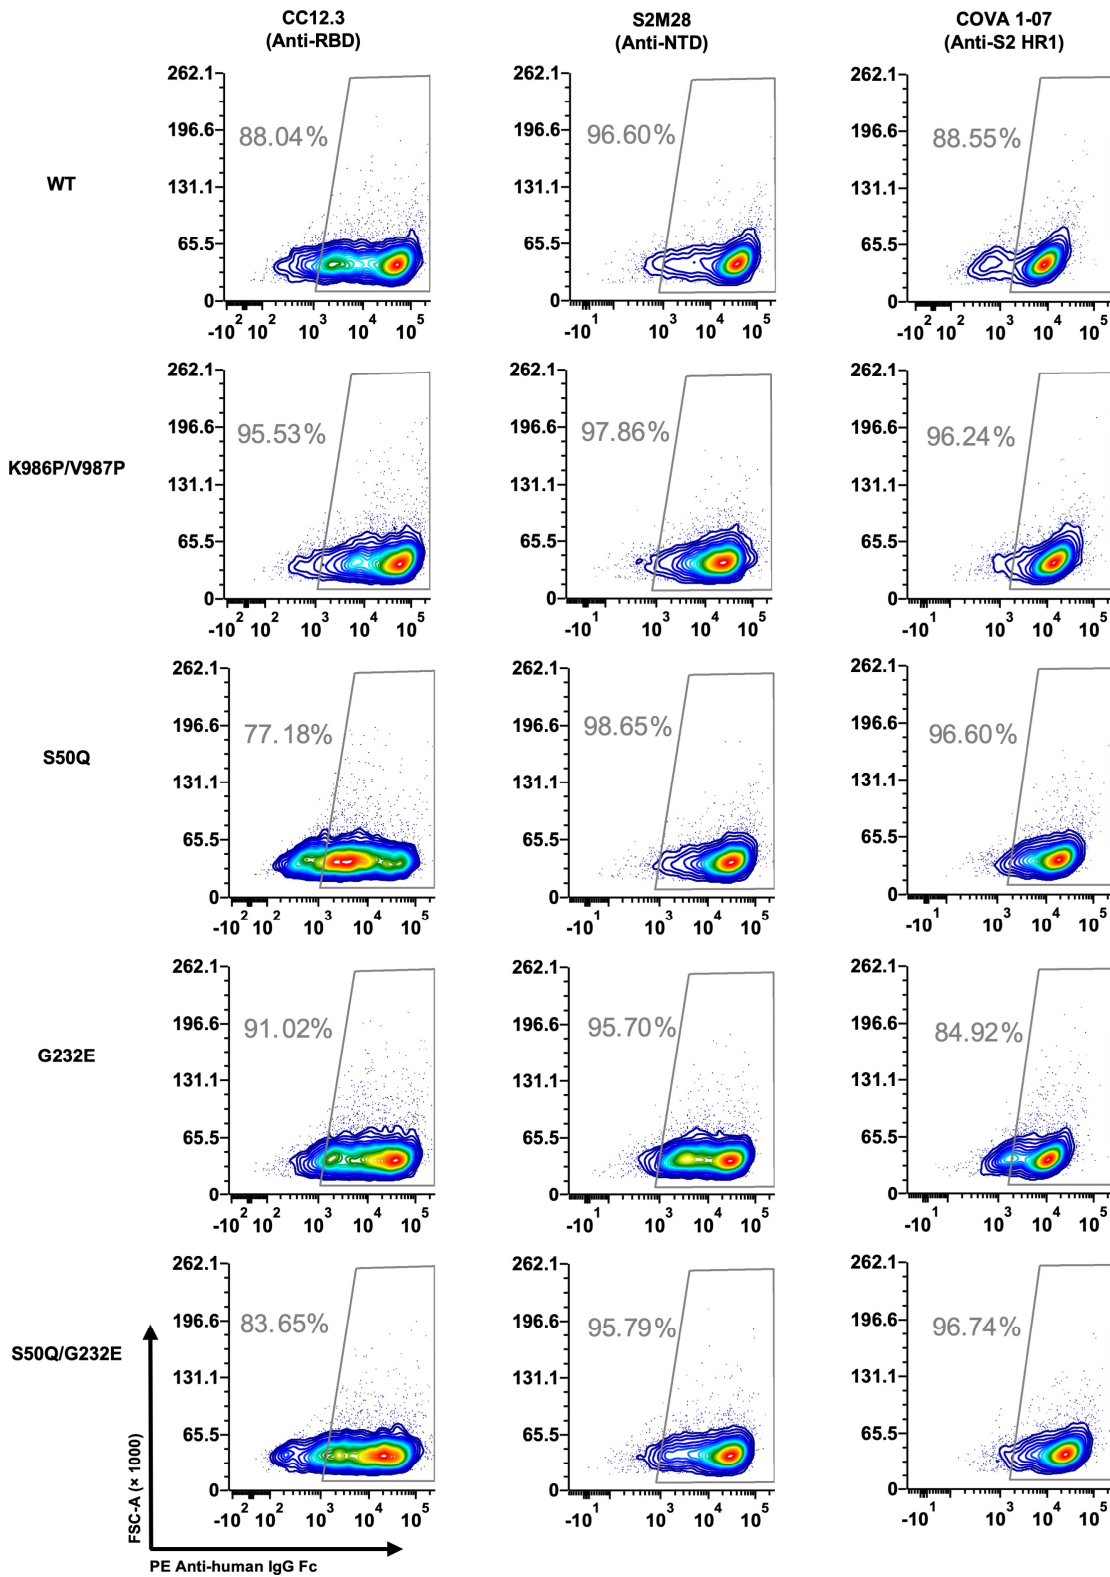

544

545 **Figure 5. S50Q, G232E, and S50Q/G232E do not alter antibody binding.** Three antibodies

546 targeting different domains on the S were tested for binding to cells expressing WT, K986P/V987P,  
547 S50Q, G232E, or S50Q/G232E S protein. Binding was measured by flow cytometry analysis.  
548 Gating was set up using untransfected HEK293T landing pad cells, which served as a negative  
549 control (**Figure S6**).

550 **REFERENCES**

- 551 1. Zhou, P. *et al.* A pneumonia outbreak associated with a new coronavirus of probable bat  
552 origin. *Nature* **579**, 270–273 (2020).
- 553 2. Zhu, N. *et al.* A novel coronavirus from patients with pneumonia in China, 2019. *N. Engl.*  
554 *J. Med.* **382**, 727–733 (2020).
- 555 3. Letko, M., Marzi, A. & Munster, V. Functional assessment of cell entry and receptor  
556 usage for SARS-CoV-2 and other lineage B betacoronaviruses. *Nat. Microbiol.* **5**, 562–569  
557 (2020).
- 558 4. Walls, A. C. *et al.* Structure, function, and antigenicity of the SARS-CoV-2 spike  
559 glycoprotein. *Cell* **181**, 281–292.e6 (2020).
- 560 5. Strohl, W. R. *et al.* Passive immunotherapy against SARS-CoV-2: from plasma-based  
561 therapy to single potent antibodies in the race to stay ahead of the variants. *BioDrugs Clin.*  
562 *Immunother. Biopharm. Gene Ther.* (2022) doi:10.1007/s40259-022-00529-7.
- 563 6. Yuan, M., Liu, H., Wu, N. C. & Wilson, I. A. Recognition of the SARS-CoV-2 receptor  
564 binding domain by neutralizing antibodies. *Biochem. Biophys. Res. Commun.* **538**, 192–203  
565 (2021).
- 566 7. Wrapp, D. *et al.* Cryo-EM structure of the 2019-nCoV spike in the prefusion  
567 conformation. *Science* **367**, 1260–1263 (2020).
- 568 8. Huang, Y., Yang, C., Xu, X., Xu, W. & Liu, S. Structural and functional properties of  
569 SARS-CoV-2 spike protein: potential antiviral drug development for COVID-19. *Acta*  
570 *Pharmacol. Sin.* **41**, 1141–1149 (2020).
- 571 9. Premkumar, L. *et al.* The receptor-binding domain of the viral spike protein is an  
572 immunodominant and highly specific target of antibodies in SARS-CoV-2 patients. *Sci. Immunol.*  
573 **5**, eabc8413 (2020).
- 574 10. Piccoli, L. *et al.* Mapping neutralizing and immunodominant sites on the sars-cov-2 spike  
575 receptor-binding domain by structure-guided high-resolution serology. *Cell* **183**, 1024–1042.e21  
576 (2020).
- 577 11. Greaney, A. J. *et al.* Comprehensive mapping of mutations in the SARS-CoV-2 receptor-  
578 binding domain that affect recognition by polyclonal human plasma antibodies. *Cell Host*  
579 *Microbe* **29**, 463–476.e6 (2021).
- 580 12. Chi, X. *et al.* A neutralizing human antibody binds to the n-terminal domain of the spike  
581 protein of sars-cov-2. *Science* **369**, 650–655 (2020).
- 582 13. Liu, L. *et al.* Potent neutralizing antibodies against multiple epitopes on SARS-CoV-2  
583 spike. *Nature* **584**, 450–456 (2020).
- 584 14. McCallum, M. *et al.* N-terminal domain antigenic mapping reveals a site of vulnerability  
585 for SARS-CoV-2. *Cell* **184**, 2332–2347.e16 (2021).

- 586 15. Suryadevara, N. *et al.* Neutralizing and protective human monoclonal antibodies  
587 recognizing the N-terminal domain of the SARS-CoV-2 spike protein. *Cell* **184**, 2316-2331.e15  
588 (2021).
- 589 16. Wang, Z. *et al.* Analysis of memory B cells identifies conserved neutralizing epitopes on  
590 the N-terminal domain of variant SARS-Cov-2 spike proteins. *Immunity* S1074-7613(22)00174-  
591 1 (2022) doi:10.1016/j.immuni.2022.04.003.
- 592 17. Cerutti, G. *et al.* Potent SARS-CoV-2 neutralizing antibodies directed against spike N-  
593 terminal domain target a single supersite. *Cell Host Microbe* **29**, 819-833.e7 (2021).
- 594 18. Wolf, K. A., Kwan, J. C. & Kamil, J. P. Structural dynamics and molecular evolution of  
595 the SARS-CoV-2 spike protein. *mBio* **13**, e02030-21 (2022).
- 596 19. Lin, W.-S., Chen, I.-C., Chen, H.-C., Lee, Y.-C. & Wu, S.-C. Glycan masking of epitopes  
597 in the ntd and rbd of the spike protein elicits broadly neutralizing antibodies against SARS-CoV-  
598 2 variants. *Front. Immunol.* **12**, (2021).
- 599 20. Tenforde, M. W. *et al.* Effectiveness of mRNA Vaccination in Preventing COVID-19-  
600 Associated Invasive Mechanical Ventilation and Death - United States, March 2021-January  
601 2022. *MMWR Morb. Mortal. Wkly. Rep.* **71**, 459-465 (2022).
- 602 21. Tartof, S. Y. *et al.* Effectiveness of mRNA BNT162b2 COVID-19 vaccine up to 6 months  
603 in a large integrated health system in the USA: a retrospective cohort study. *The Lancet* **398**,  
604 1407-1416 (2021).
- 605 22. Heath, P. T. *et al.* Safety and efficacy of NVX-CoV2373 COVID-19 vaccine. *N. Engl. J.*  
606 *Med.* **385**, 1172-1183 (2021).
- 607 23. Sridhar, S. *et al.* Safety and immunogenicity of an AS03-adjuvanted SARS-CoV-2  
608 recombinant protein vaccine (CoV2 preS dTM) in healthy adults: interim findings from a phase  
609 2, randomised, dose-finding, multicentre study. *Lancet Infect. Dis.* **22**, 636-648 (2022).
- 610 24. Pollet, J., Chen, W.-H. & Strych, U. Recombinant protein vaccines, a proven approach  
611 against coronavirus pandemics. *Adv. Drug Deliv. Rev.* **170**, 71-82 (2021).
- 612 25. Schlake, T., Thess, A., Fotin-Mleczek, M. & Kallen, K.-J. Developing mRNA-vaccine  
613 technologies. *RNA Biol.* **9**, 1319-1330 (2012).
- 614 26. Juraszek, J. *et al.* Stabilizing the closed SARS-CoV-2 spike trimer. *Nat. Commun.* **12**,  
615 244 (2021).
- 616 27. Hsieh, C.-L. *et al.* Structure-based design of prefusion-stabilized SARS-CoV-2 spikes.  
617 *Science* **369**, 1501-1505 (2020).
- 618 28. Olmedillas, E. *et al.* Structure-based design of a highly stable, covalently-linked SARS-  
619 CoV-2 spike trimer with improved structural properties and immunogenicity. *bioRxiv*  
620 2021.05.06.441046 (2021) doi:10.1101/2021.05.06.441046.
- 621 29. Ellis, D. *et al.* Stabilization of the SARS-CoV-2 spike receptor-binding domain using  
622 deep mutational scanning and structure-based design. *Front. Immunol.* **12**, (2021).

- 623 30. Fowler, D. M. & Fields, S. Deep mutational scanning: a new style of protein science. *Nat.*  
624 *Methods* **11**, 801–807 (2014).
- 625 31. Greaney, A. J. *et al.* Mapping mutations to the SARS-CoV-2 RBD that escape binding by  
626 different classes of antibodies. *Nat. Commun.* **12**, 4196 (2021).
- 627 32. Greaney, A. J., Starr, T. N. & Bloom, J. D. An antibody-escape estimator for mutations to  
628 the SARS-CoV-2 receptor-binding domain. *Virus Evol.* **8**, veac021 (2022).
- 629 33. Starr, T. N. *et al.* SARS-CoV-2 RBD antibodies that maximize breadth and resistance to  
630 escape. *Nature* **597**, 97–102 (2021).
- 631 34. Starr, T. N. *et al.* Deep mutational scanning of SARS-CoV-2 receptor binding domain  
632 reveals constraints on folding and ACE2 binding. *Cell* **182**, 1295–1310.e20 (2020).
- 633 35. Starr, T. N., Greaney, A. J., Dingens, A. S. & Bloom, J. D. Complete map of SARS-CoV-  
634 2 RBD mutations that escape the monoclonal antibody LY-CoV555 and its cocktail with LY-  
635 CoV016. *Cell Rep. Med.* **2**, 100255 (2021).
- 636 36. Starr, T. N. *et al.* Prospective mapping of viral mutations that escape antibodies used to  
637 treat COVID-19. *Science* **371**, 850–854 (2021).
- 638 37. Matreyek, K. A., Stephany, J. J. & Fowler, D. M. A platform for functional assessment of  
639 large variant libraries in mammalian cells. *Nucleic Acids Res.* **45**, e102 (2017).
- 640 38. Shukla, N., Roelle, S. M., Suzart, V. G., Bruchez, A. M. & Matreyek, K. A. Mutants of  
641 human ACE2 differentially promote SARS-CoV and SARS-CoV-2 spike mediated infection.  
642 *PLoS Pathog.* **17**, e1009715 (2021).
- 643 39. Zhou, P. *et al.* A human antibody reveals a conserved site on beta-coronavirus spike  
644 proteins and confers protection against SARS-CoV-2 infection. *Sci. Transl. Med.* **14**, eabi9215.
- 645 40. Olson, C. A., Wu, N. C. & Sun, R. A comprehensive biophysical description of pairwise  
646 epistasis throughout an entire protein domain. *Curr. Biol.* **24**, 2643–2651 (2014).
- 647 41. Matreyek, K. A. *et al.* Multiplex assessment of protein variant abundance by massively  
648 parallel sequencing. *Nat. Genet.* **50**, 874–882 (2018).
- 649 42. Chan, K. K., Tan, T. J. C., Narayanan, K. K. & Procko, E. An engineered decoy receptor  
650 for SARS-CoV-2 broadly binds protein S sequence variants. *Sci. Adv.* **7**, eabf1738 (2021).
- 651 43. McCallum, M. *et al.* Molecular basis of immune evasion by the Delta and Kappa SARS-  
652 CoV-2 variants. *Science* **374**, 1621–1626 (2021).
- 653 44. Wrobel, A. G. *et al.* SARS-CoV-2 and bat RaTG13 spike glycoprotein structures inform  
654 on virus evolution and furin-cleavage effects. *Nat. Struct. Mol. Biol.* **27**, 763–767 (2020).
- 655 45. Rosa, A. *et al.* SARS-CoV-2 can recruit a heme metabolite to evade antibody immunity.  
656 *Sci. Adv.* **7**, eabg7607 (2021).
- 657 46. Kellogg, E. H., Leaver-Fay, A. & Baker, D. Role of conformational sampling in computing  
658 mutation-induced changes in protein structure and stability. *Proteins* **79**, 830–838 (2011).

- 659 47. Sanders, R. W. & Moore, J. P. Virus vaccines: proteins prefer prolines. *Cell Host*  
660 *Microbe* **29**, 327–333 (2021).
- 661 48. Feng, S. *et al.* Improved split fluorescent proteins for endogenous protein labeling. *Nat.*  
662 *Commun.* **8**, 370 (2017).
- 663 49. Yuan, M. *et al.* Structural basis of a shared antibody response to SARS-CoV-2. *Science*  
664 **369**, 1119–1123 (2020).
- 665 50. Claireaux, M. *et al.* A public antibody class recognizes a novel S2 epitope exposed on  
666 open conformations of SARS-CoV-2 spike. *bioRxiv* 2021.12.01.470767 (2021)  
667 doi:10.1101/2021.12.01.470767.
- 668 51. Yewdell, J. W. Antigenic drift: Understanding COVID-19. *Immunity* **54**, 2681–2687  
669 (2021).
- 670 52. Harvey, W. T. *et al.* SARS-CoV-2 variants, spike mutations and immune escape. *Nat.*  
671 *Rev. Microbiol.* **19**, 409–424 (2021).
- 672 53. Yuan, M. *et al.* Structural and functional ramifications of antigenic drift in recent SARS-  
673 CoV-2 variants. *Science* **373**, 818–823 (2021).
- 674 54. Telenti, A. *et al.* After the pandemic: perspectives on the future trajectory of COVID-19.  
675 *Nature* **596**, 495–504 (2021).
- 676 55. Wang, P. *et al.* Antibody resistance of SARS-CoV-2 variants B.1.351 and B.1.1.7.  
677 *Nature* **593**, 130–135 (2021).
- 678 56. Chen, R. E. *et al.* Resistance of SARS-CoV-2 variants to neutralization by monoclonal  
679 and serum-derived polyclonal antibodies. *Nat. Med.* **27**, 717–726 (2021).
- 680 57. McCallum, M. *et al.* SARS-CoV-2 immune evasion by the B.1.427/B.1.429 variant of  
681 concern. *Science* **373**, 648–654 (2021).
- 682 58. Mlcochova, P. *et al.* SARS-CoV-2 B.1.617.2 Delta variant replication and immune  
683 evasion. *Nature* **599**, 114–119 (2021).
- 684 59. Cameroni, E. *et al.* Broadly neutralizing antibodies overcome SARS-CoV-2 Omicron  
685 antigenic shift. *Nature* **602**, 664–670 (2022).
- 686 60. Singh, Y. *et al.* N-terminal domain of SARS CoV-2 spike protein mutation associated  
687 reduction in effectivity of neutralizing antibody with vaccinated individuals. *J. Med. Virol.* **93**,  
688 5726–5728 (2021).
- 689 61. Gobeil, S. M.-C. *et al.* Effect of natural mutations of SARS-CoV-2 on spike structure,  
690 conformation, and antigenicity. *Science* **373**, eabi6226 (2021).
- 691 62. Lok, S.-M. An NTD supersite of attack. *Cell Host Microbe* **29**, 744–746 (2021).
- 692 63. Javanmardi, K. *et al.* Antibody escape and cryptic cross-domain stabilization in the  
693 SARS-CoV-2 Omicron spike protein. *bioRxiv* 2022.04.18.488614 (2022)  
694 doi:10.1101/2022.04.18.488614.



- 695 64. Wang, S. *et al.* AXL is a candidate receptor for SARS-CoV-2 that promotes infection of  
696 pulmonary and bronchial epithelial cells. *Cell Res.* **31**, 126–140 (2021).
- 697 65. Gu, Y. *et al.* Receptome profiling identifies KREMEN1 and ASGR1 as alternative  
698 functional receptors of SARS-CoV-2. *Cell Res.* **32**, 24–37 (2022).
- 699 66. Soh, W. T. *et al.* The N-terminal domain of spike glycoprotein mediates SARS-CoV-2  
700 infection by associating with L-SIGN and DC-SIGN. *bioRxiv* 2020.11.05.369264 (2020)  
701 doi:10.1101/2020.11.05.369264.
- 702 67. Qing, E. *et al.* Inter-domain communication in SARS-CoV-2 spike proteins controls  
703 protease-triggered cell entry. *Cell Rep.* **39**, 110786 (2022).
- 704 68. Qing, E. *et al.* Dynamics of SARS-CoV-2 spike proteins in cell entry: control elements in  
705 the amino-terminal domains. *mBio* **12**, e01590-21 (2021).
- 706 69. Wang, Y., Lei, R., Nourmohammad, A. & Wu, N. C. Antigenic evolution of human  
707 influenza H3N2 neuraminidase is constrained by charge balancing. *eLife* **10**, e72516 (2021).
- 708 70. Zhang, J., Kobert, K., Flouri, T. & Stamatakis, A. PEAR: a fast and accurate Illumina  
709 Paired-End reAd mergeR. *Bioinformatics* **30**, 614–620 (2014).
- 710 71. Cock, P. J. A. *et al.* Biopython: freely available Python tools for computational molecular  
711 biology and bioinformatics. *Bioinformatics* **25**, 1422–1423 (2009).
- 712 72. Kabsch, W. & Sander, C. Dictionary of protein secondary structure: pattern recognition  
713 of hydrogen-bonded and geometrical features. *Biopolymers* **22**, 2577–2637 (1983).
- 714 73. Joosten, R. P. *et al.* A series of PDB related databases for everyday needs. *Nucleic  
715 Acids Res.* **39**, D411-419 (2011).
- 716 74. Tien, M. Z., Meyer, A. G., Sydykova, D. K., Spielman, S. J. & Wilke, C. O. Maximum  
717 allowed solvent accessibilities of residues in proteins. *PloS One* **8**, e80635 (2013).
- 718 75. Wu, N. C. *et al.* A natural mutation between sars-cov-2 and sars-cov determines  
719 neutralization by a cross-reactive antibody. *PLOS Pathog.* **16**, e1009089 (2020).
- 720 76. Temmam, S. *et al.* Bat coronaviruses related to SARS-CoV-2 and infectious for human  
721 cells. *Nature* **604**, 330–336 (2022).
- 722 77. Zhou, H. *et al.* A novel bat coronavirus closely related to sars-cov-2 contains natural  
723 insertions at the s1/s2 cleavage site of the spike protein. *Curr. Biol.* **30**, 2196-2203.e3 (2020).
- 724 78. Lam, T. T.-Y. *et al.* Identifying SARS-CoV-2-related coronaviruses in Malayan pangolins.  
725 *Nature* **583**, 282–285 (2020).
- 726 79. Tao, Y. & Tong, S. Complete genome sequence of a severe acute respiratory syndrome-  
727 related coronavirus from kenyan bats. *Microbiol. Resour. Announc.* **8**, e00548-19 (2019).
- 728 80. Shu, Y. & McCauley, J. GISAID: Global initiative on sharing all influenza data - from  
729 vision to reality. *Euro Surveill. Bull. Eur. Sur Mal. Transm. Eur. Commun. Dis. Bull.* **22**, 30494  
730 (2017).

- 731 81. Ream, D. & Kiss, A. J. NCBI / GenBank BLAST output XML parser tool.  
732 <https://www.semanticscholar.org/paper/NCBI-%2F-GenBank-BLAST-Output-XML-Parser-Tool->  
733 [Ream-Kiss/3ead0ae31b91d3096369de11f3488024f752bdc5](https://www.semanticscholar.org/paper/NCBI-%2F-GenBank-BLAST-Output-XML-Parser-Tool-) (2013).
- 734 82. Katoh, K. & Standley, D. M. MAFFT multiple sequence alignment software version 7:  
735 improvements in performance and usability. *Mol. Biol. Evol.* **30**, 772–780 (2013).
- 736 83. Rodrigues, J. P. G. L. M., Teixeira, J. M. C., Trellet, M. & Bonvin, A. M. J. J. pdb-tools: a  
737 swiss army knife for molecular structures. *F1000Research* **7**, 1961 (2018).
- 738
